# Supplementary material for: Thiol decorated defective metal–organic frameworks embedded with palladium nanoparticles for efficient Cr(vi) reduction
Source: Royal Society of Chemistry journal article supplement (doi:10.1039/d1qi00759a), 2021-01-01
Supplement: d1qi00759a1.pdf [file d1qi00759a1.pdf]

## Electronic Supporting Information

### **Thiol Decorated Defective Metal-Organic Framework Embedded with Palladium Nanoparticles for Efficient Cr(VI) Reduction.**

Asha Pankajakshan,<sup>a</sup> Aparna Ravarikkandy,<sup>a</sup> Balu P. Ratheesh,<sup>a</sup> Manju P. Maman,<sup>a</sup> Sukhendu Mandal<sup>\*a</sup>

<sup>a</sup>School of Chemistry, Indian Institute of Science Education and Research Thiruvananthapuram, Kerala, India-695551. Email: [sukhendu@iisertvm.ac.in](mailto:sukhendu@iisertvm.ac.in)

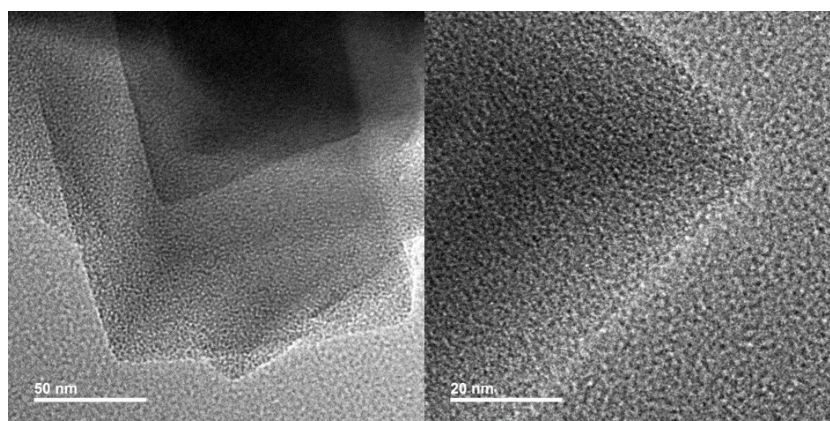

(a)

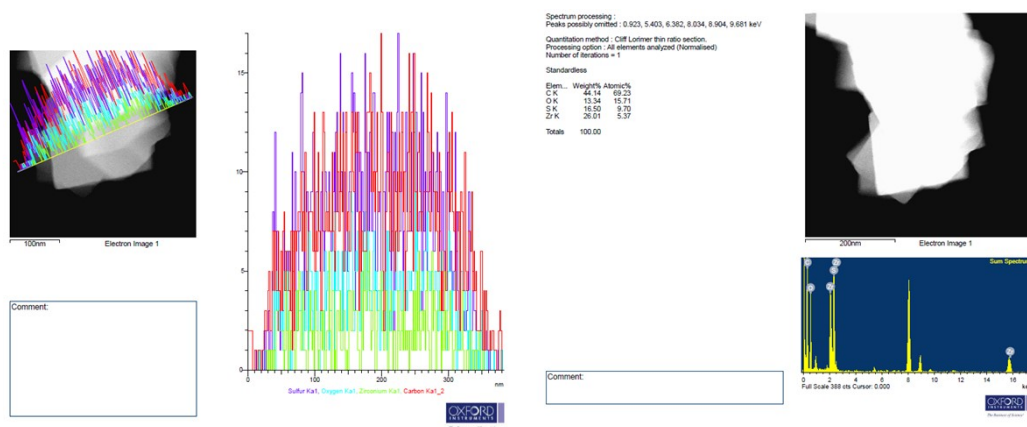

(b)

(c)

**Figure S1.** (a) TEM images of of the -SH incorporated UiO-66, (b) and (c) TEM- EDX spectra of the samples. Note: Presence of sulfur atom supports the incorporation of -SH group in the structure.

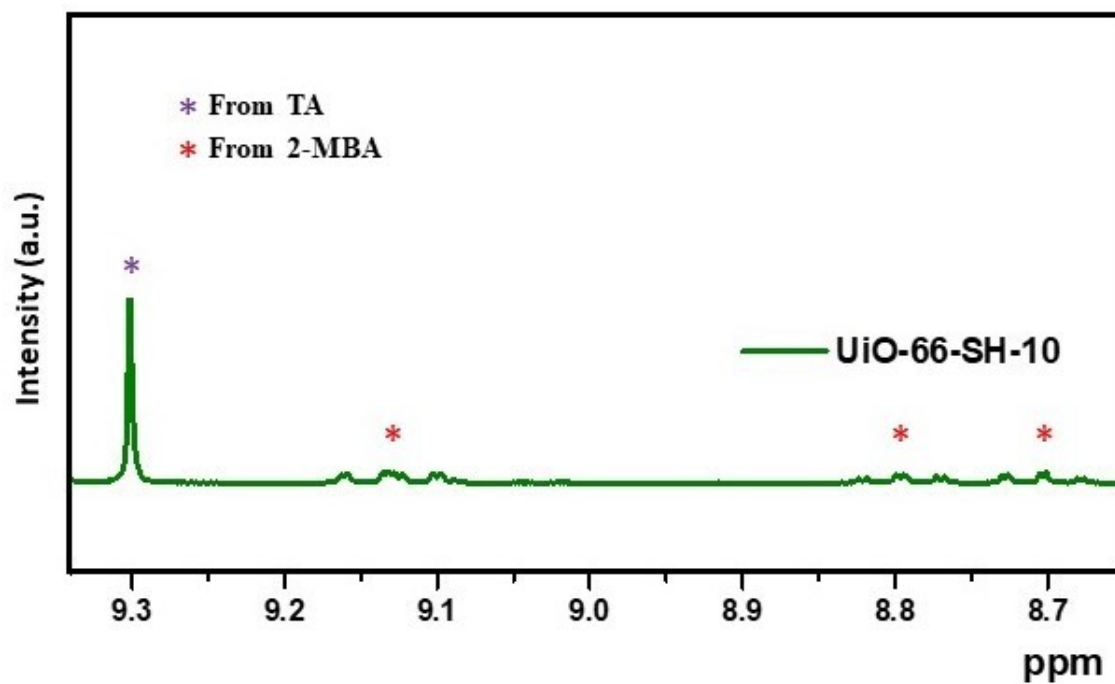

**Figure S2.** The  $^1\text{H}$  NMR spectra of UiO-66-SH .

**Table S1.** The molar ratio of 2-MBA in UiO-66-SH.

| MOF          | 2-MBA/TA |
|--------------|----------|
| UiO-66-SH-10 | 0.41     |

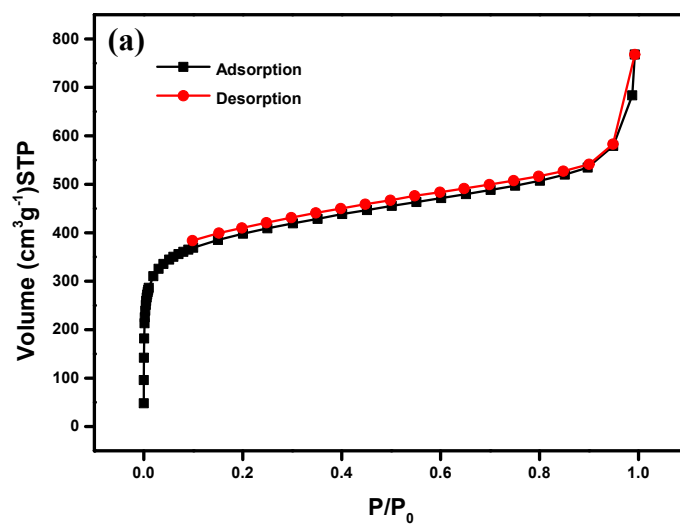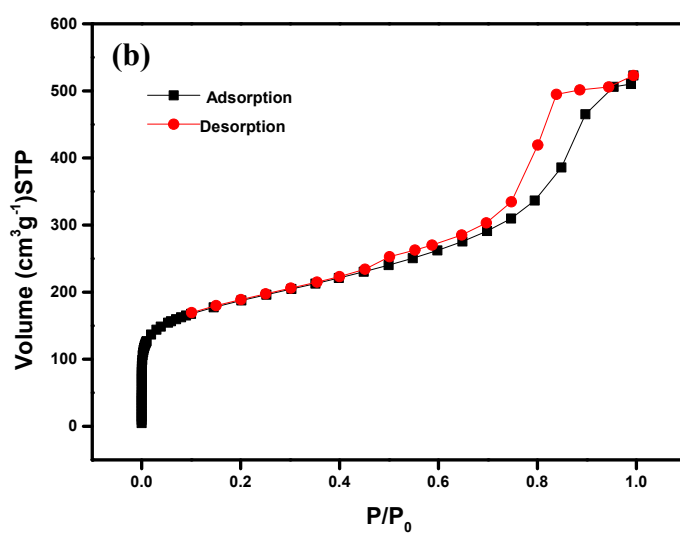

**Figure S3.**  $\text{N}_2$  adsorption-desorption spectra of (a) UiO-66-SH-10 and (b) Pd@ UiO-66-SH-10.

| Elem... | Weight% | Atomic% |
|---------|---------|---------|
| C K     | 16.59   | 42.07   |
| O K     | 13.92   | 26.50   |
| S K     | 14.12   | 13.42   |
| Zr K    | 45.31   | 15.13   |
| Pd L    | 10.06   | 2.88    |
| Totals  | 100.00  |         |

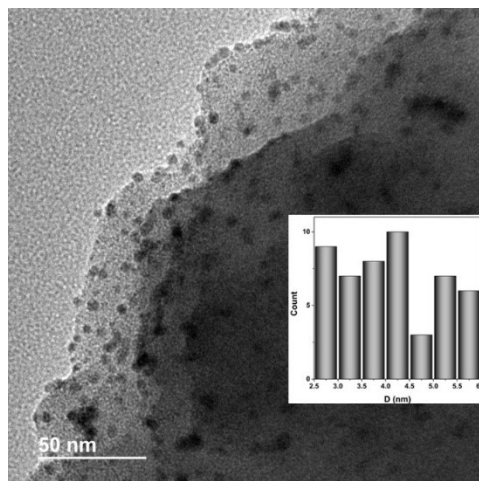

(a)

(b)

**Figure S4.** (a) Percentage of elements present in the Pd@UiO-66-SH; (b) TEM images of as-synthesized Pd@UiO-66-SH. Inset: Histogram showing particles size.

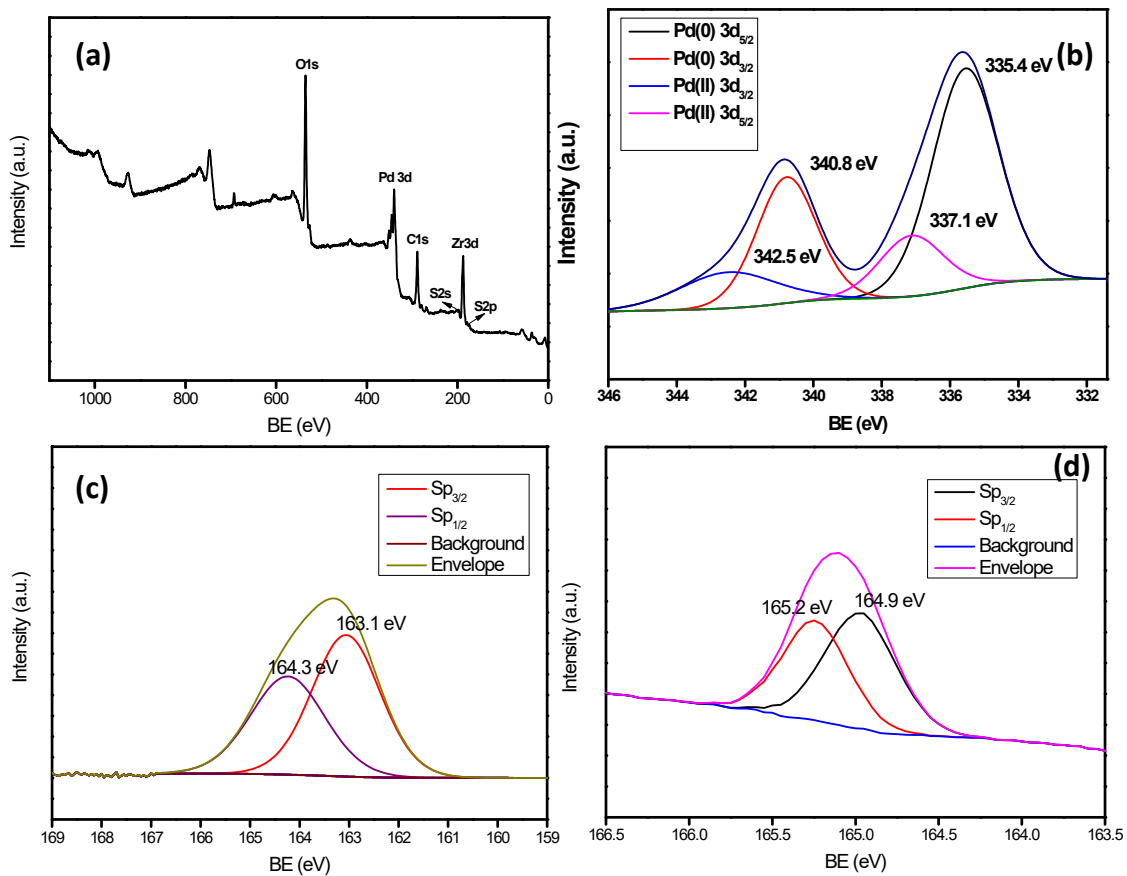

**Figure S5.** (a) XPS survey spectra, the binding energy of (b) Pd and (c & d) S. Note: Deconvulation showed that 77.5 % Pd in is in metallic state and 22.5 % is in Pd<sup>2+</sup> state.

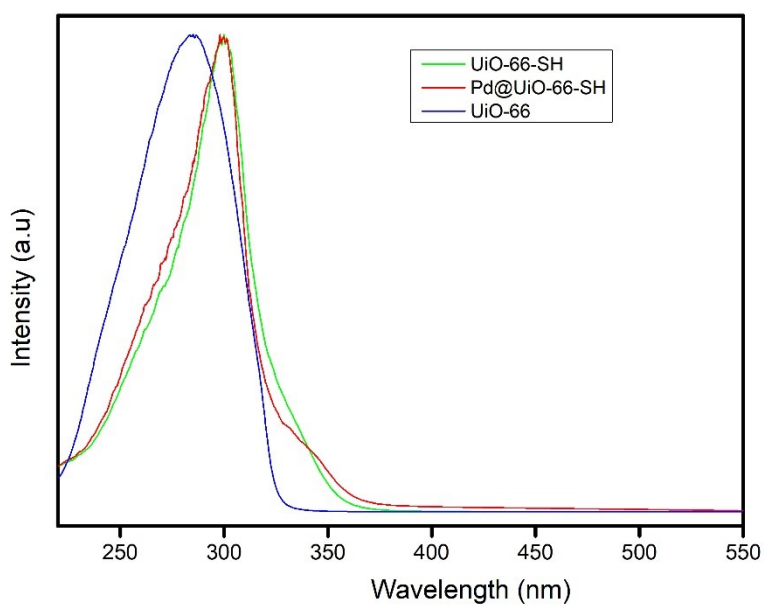

(a)

(b)

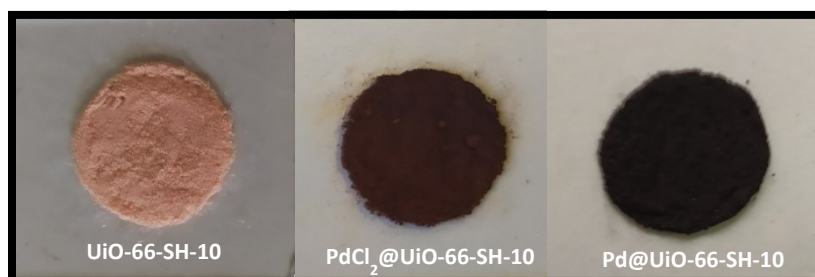

**Figure S6.**  
UV-Vis  
absorption  
spectra of  
different  
samples in  
solid state; (b)  
color of the  
respective  
samples under  
visible light.

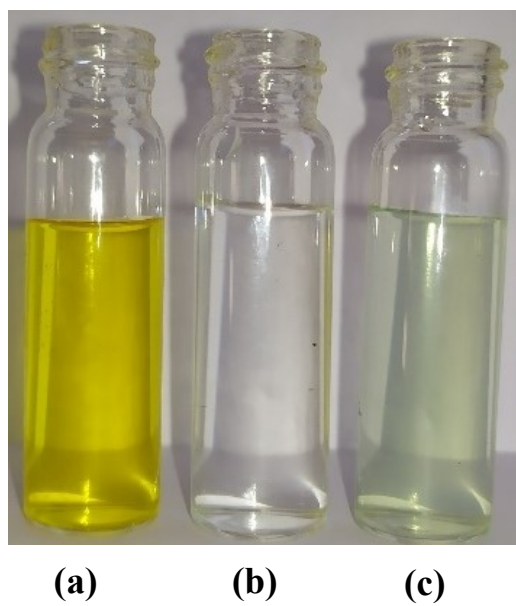

**Figure S7.** Colour change of  $\text{K}_2\text{Cr}_2\text{O}_7$  (a) before the reaction, (b) after the reaction and (c) after adding excess dilute NaOH solution.



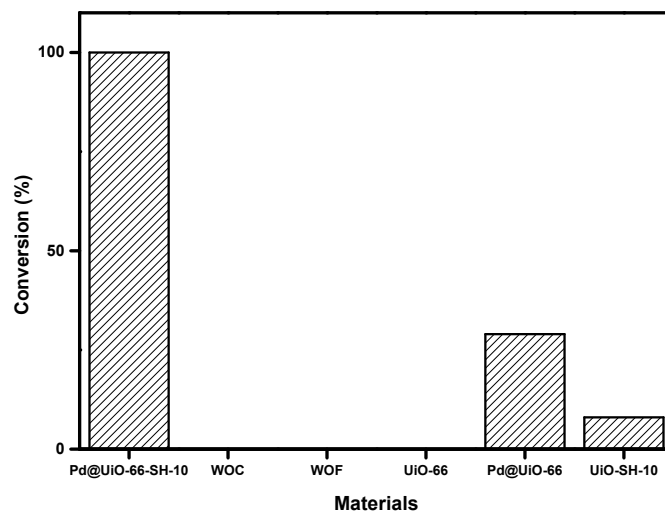

**Figure S8.** Catalytic conversion of Cr(VI) to Cr(III) with various materials. WOC and WOF are without catalyst and without formic acid, respectively.

**Table S2.** List of comparative compounds with time taken for the reduction of Cr(VI) to Cr(III) ions.

| <i>No</i> | <i>Catalyst</i>                                                                                                      | <i>Time(min)</i> | <i>References</i> |
|-----------|----------------------------------------------------------------------------------------------------------------------|------------------|-------------------|
| 1         | <i>Pd@UiO-66-SH-10</i>                                                                                               | 3                | <i>This work</i>  |
| 2         | <i>MOF-Titanate nanotube composite</i>                                                                               | 20               | 1                 |
| 3         | <i>Nanostructured bismuth vanadate</i>                                                                               | 160              | 2                 |
| 4         | <i>Zr(IV) MOF, JLU-MOF 60</i>                                                                                        | 70               | 3                 |
| 5         | <i>AuPd@Pd NCs</i>                                                                                                   | 3                | 4                 |
| 6         | <i>Zn MOF, NNU-36</i>                                                                                                | 60               | 5                 |
| 7         | <i>CuPd alloy nanoparticle</i>                                                                                       | 7                | 6                 |
| 8         | <i>Co-RGO</i>                                                                                                        | 9                | 7                 |
| 9         | <i>Pd/GO</i>                                                                                                         | 12-22            | 8                 |
| 10        | <i>Pd/Fe-NMC</i>                                                                                                     | 20               | 9                 |
| 11        | <i>Mixed metal-MIL-101</i>                                                                                           | 15-18            | 10                |
| 12        | <i>Pd@SiO<sub>2</sub>-NH<sub>2</sub></i>                                                                             | 6                | 11                |
| 13        | <i>highly reduced {MnII(P<sup>V</sup><sub>4</sub>Mo<sup>V</sup><sub>6</sub>O<sub>31</sub>)<sub>2</sub>} clusters</i> | 240              | 12                |
| 14        | <i>Bi<sub>2</sub>S<sub>3</sub>/Bi<sub>2</sub>WO<sub>6</sub></i>                                                      | 60               | 13                |
| 15        | <i>Ni NP@RGO</i>                                                                                                     | 4                | 14                |
| 16        | <i>RGO/GO-UiO-66-NH<sub>2</sub></i>                                                                                  | 120              | 15                |
| 17        | <i>Pd/Pt/Rh/Au@MIL-101</i>                                                                                           | 40-210           | 16                |
| 18        | <i>Pd@UiO-66-NH<sub>2</sub></i>                                                                                      | 90               | 17                |
| 19        | <i>Pd@uniform electrospun PEI/PVA nanofibers</i>                                                                     | 12               | 18                |
| 20        | <i>NH<sub>2</sub>-MIL-88B (Fe)</i>                                                                                   | 45               | 19                |

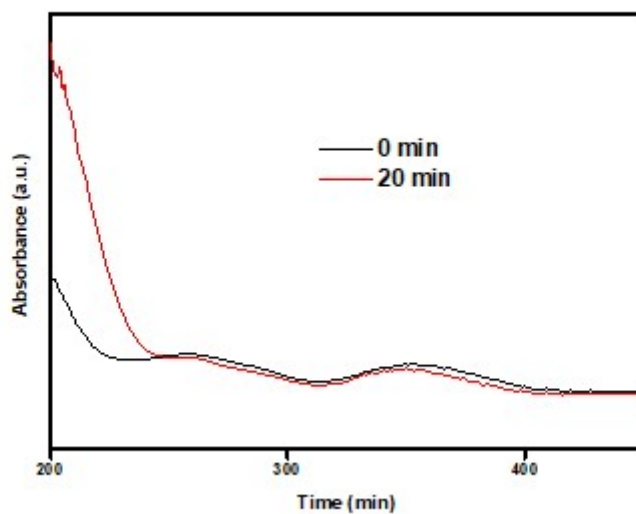

**Figure S9.** UV-Vis spectra after the leaching test. A fresh amount of Cr(VI) solution was added to the solution after catalysis and monitored the change at 0 and 20 minutes intervals.

**Table S3.** Concentration of the elements of interest obtained by ICP-MS.

| <i>Condition</i>                             | <i>Concentration of Pd</i> | <i>Concentration of Zr</i> |
|----------------------------------------------|----------------------------|----------------------------|
| <i>Solution obtained after the catalysis</i> | <i>0 ppm</i>               | <i>0 ppm</i>               |

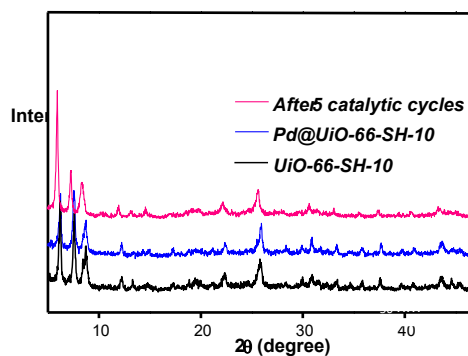

Figure S10. The XRD pattern of Pd@UiO-66-SH-10 before and after 5 cycles of catalysis.

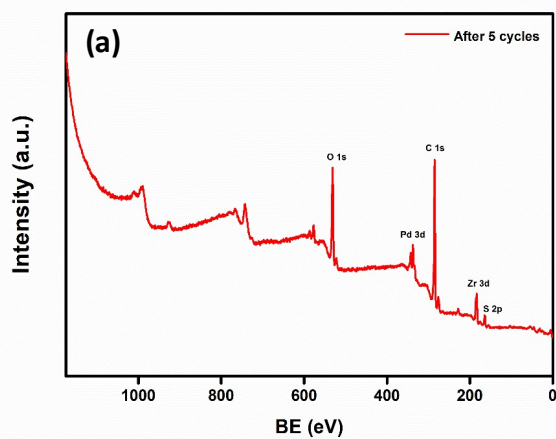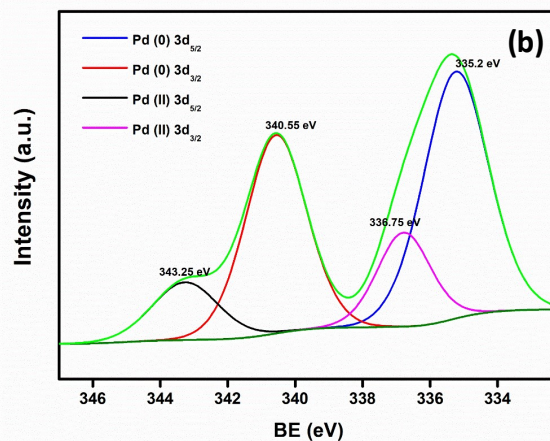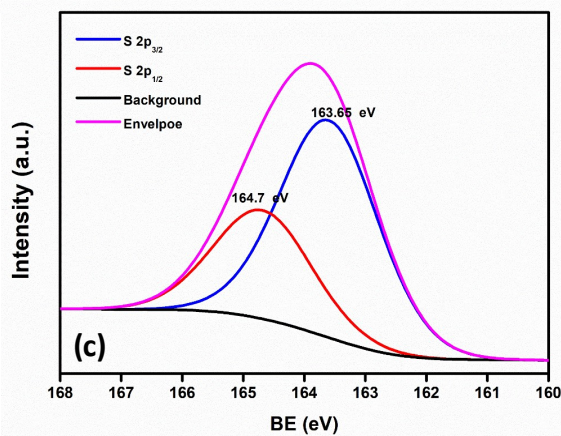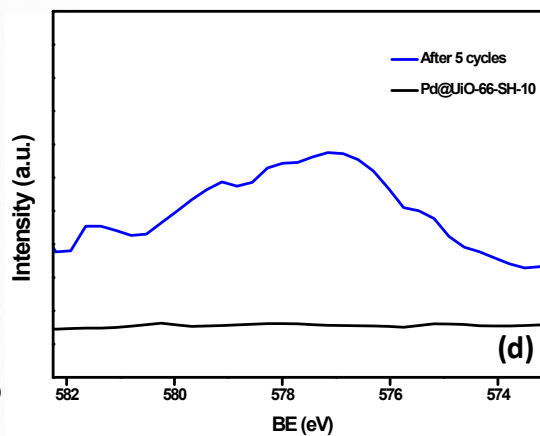

**Figure S11.** (a) XPS survey spectra, the binding energy of (b) Pd and (c) S, (d) narrow-scan spectra of Cr 2p showing the weak peak of the catalyst after 5 catalytic cycles.

Note: Deconvolution showed that 74 % Pd is in metallic state and 26 % is in Pd<sup>2+</sup> state.

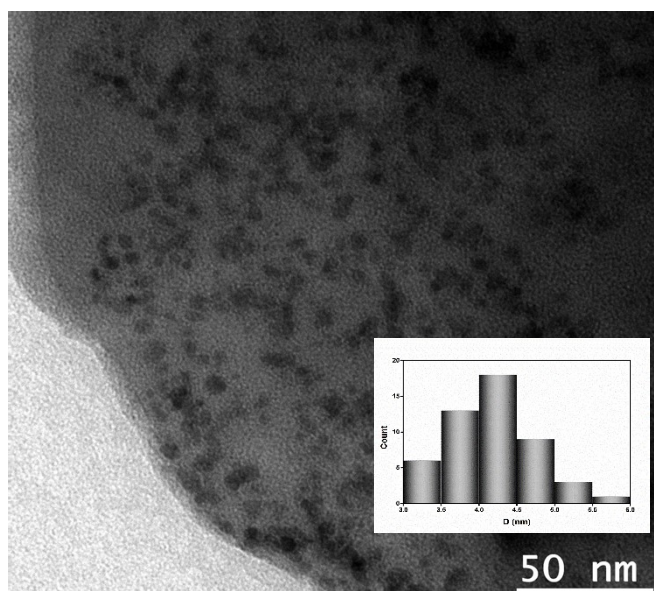

**Figure S12.** TEM image of Pd@UiO-66-SH after 5 cycles of catalysis. Inset: Histogram of particles size.

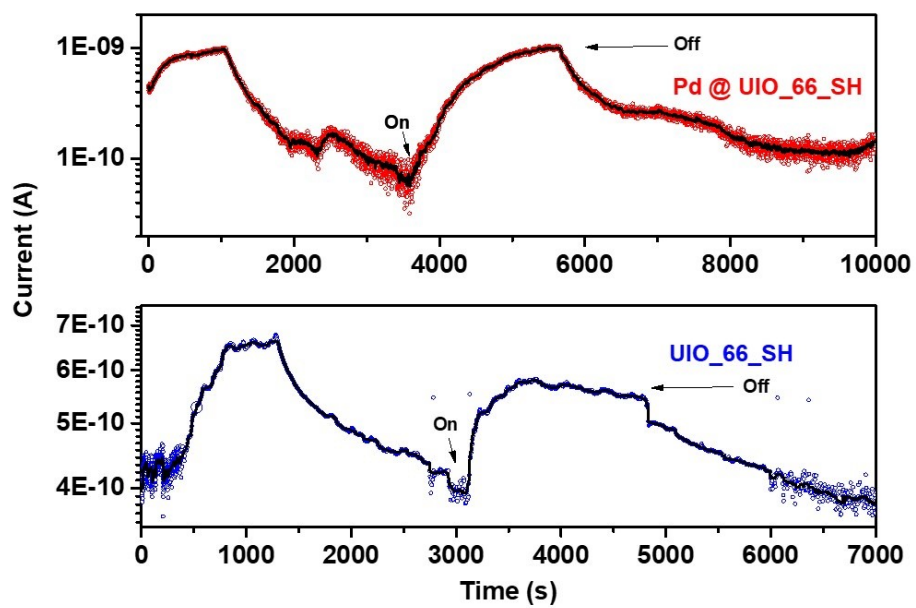

**Figure S13.** Time-resolved rise and decay curve photocurrent of Pd@UiO-66-SH and UiO-66-SH, respectively.

## References:

- [1] X. Wang *et al.*, *Environ. Pollut.*, vol. 249, pp. 502–511, 2019.
- [2] D. P. Jaihindh, B. Thirumalraj, S. M. Chen, P. Balasubramanian, and Y. P. Fu, *J. Hazard. Mater.*, 2018, **367**, 647–657.
- [3] J. Liu *et al.*, *J. Mater. Chem. A*, 2019, **7**, 16833–16841.
- [4] F.-Q. Shao, J.-J. Feng, X.-X. Lin, L.-Y. Jiang, and A.-J. Wang, *Appl. Catal. B Environ.*, 2017, **208**, 128–134.
- [5] H. Zhao, Q. Xia, H. Xing, D. Chen, and H. Wang, *ACS Sustain. Chem. Eng.*, 2017, **5**, 4449–4456.
- [6] H. Saikia, B. J. Borah, Y. Yamada, and P. Bharali, *J. Colloid Interface Sci.*, 2017, **486**, 46–57.
- [7] T. Xu, J. Xue, X. Zhang, G. He, and H. Chen, *Appl. Surf. Sci.*, 2017, **402**, 294–300.
- [8] M. Celebi, K. Karakas, I. E. Ertas, M. Kaya, and M. Zahmakiran, *ChemistrySelect*, 2017, **2**, 8312–8319.
- [9] S. Li *et al.*, *Environ. Sci. Pollut. Res.*, 2016, **23**, 22027–22036.
- [10] M. Trivedi, Bhaskaran, A. Kumar, G. Singh, A. Kumar, and N. P. Rath, *New J. Chem.*, 2016, **40**, 3109–3118.
- [11] M. Celebi, M. Yurderi, A. Bulut, M. Kaya, and M. Zahmakiran, *Appl. Catal. B Environ.*, 2016, **180**, 53–64.
- [12] K. Gong *et al.*, *Eur. J. Inorg. Chem.*, 2015, **32**, 5351–5356.
- [13] A. Rauf *et al.*, *ACS Sustain. Chem. Eng.*, 2015, **3**, 2847–2855.
- [14] K. Bhowmik, A. Mukherjee, M. K. Mishra, and G. De, *Langmuir*, 2014, **30**, 3209–3216.
- [15] L. Shen, L. Huang, S. Liang, R. Liang, N. Qin, and L. Wu, *RSC Adv.*, 2014, **4**, 2546–2549.
- [16] M. Yadav and Q. Xu, *Chem. Commun.*, 2013, **49**, 3327–3329.



- [17] L. Shen, W. Wu, R. Liang, R. Lin, and L. Wu, *Nanoscale*, 2013, **5**, 9374–9382.
- [18] Y. Huang *et al.*, *ACS Appl. Mater. Interfaces*, 2012, **4**, 3054–3061.
- [19] L. Shi *et al.*, *Adv. Sci.*, 2015, **2**, 1500006.
